# Supplementary material for: Torix group Rickettsia are widespread in Culicoides biting midges (Diptera: Ceratopogonidae), reach high frequency and carry unique genomic features
Source: PubMed Central journal article supplement (PMC5656822; doi:10.1111/1462-2920.13887), 2017-09-18
Supplement: EMI-19-4238-s001.pdf [file EMI-19-4238-s001.pdf]

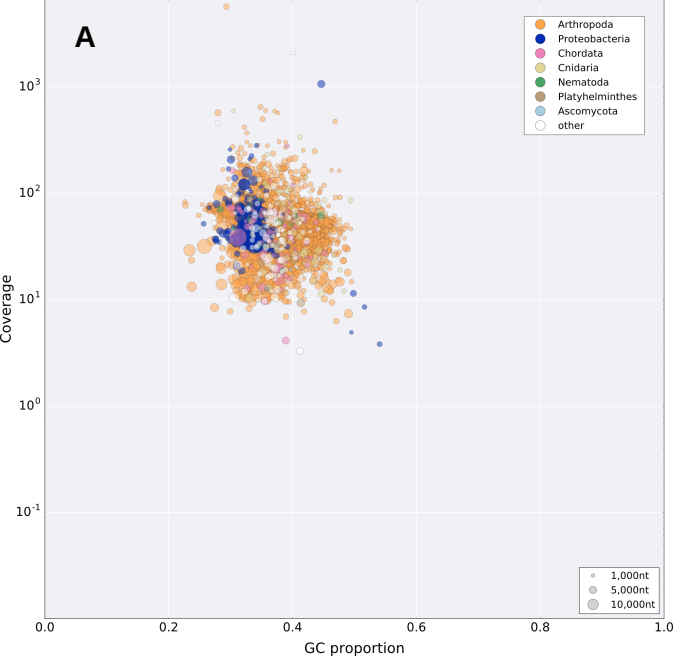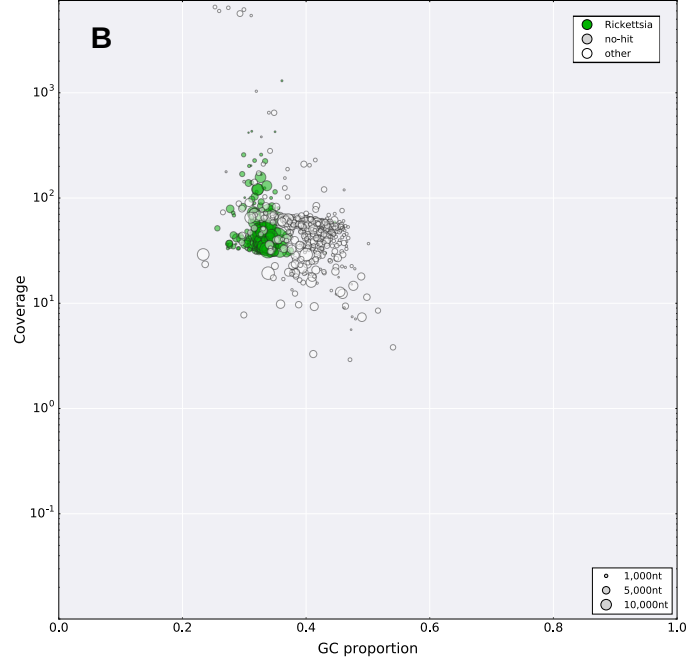

**Figure S1.** Taxon annotated GC-coverageplots. A) Primary genome assembly of *Culicoides newsteadii* N5. B) post filtering against a local database containing all available (complete and draft) *Rickettsia* genomes.
