# Supplementary material for: Torix group Rickettsia are widespread in Culicoides biting midges (Diptera: Ceratopogonidae), reach high frequency and carry unique genomic features
Source: PubMed Central journal article supplement (PMC5656822; doi:10.1111/1462-2920.13887), 2017-09-18
Supplement: EMI-19-4238-s002.pdf [file EMI-19-4238-s002.pdf]

# BUSCO Assessment Results

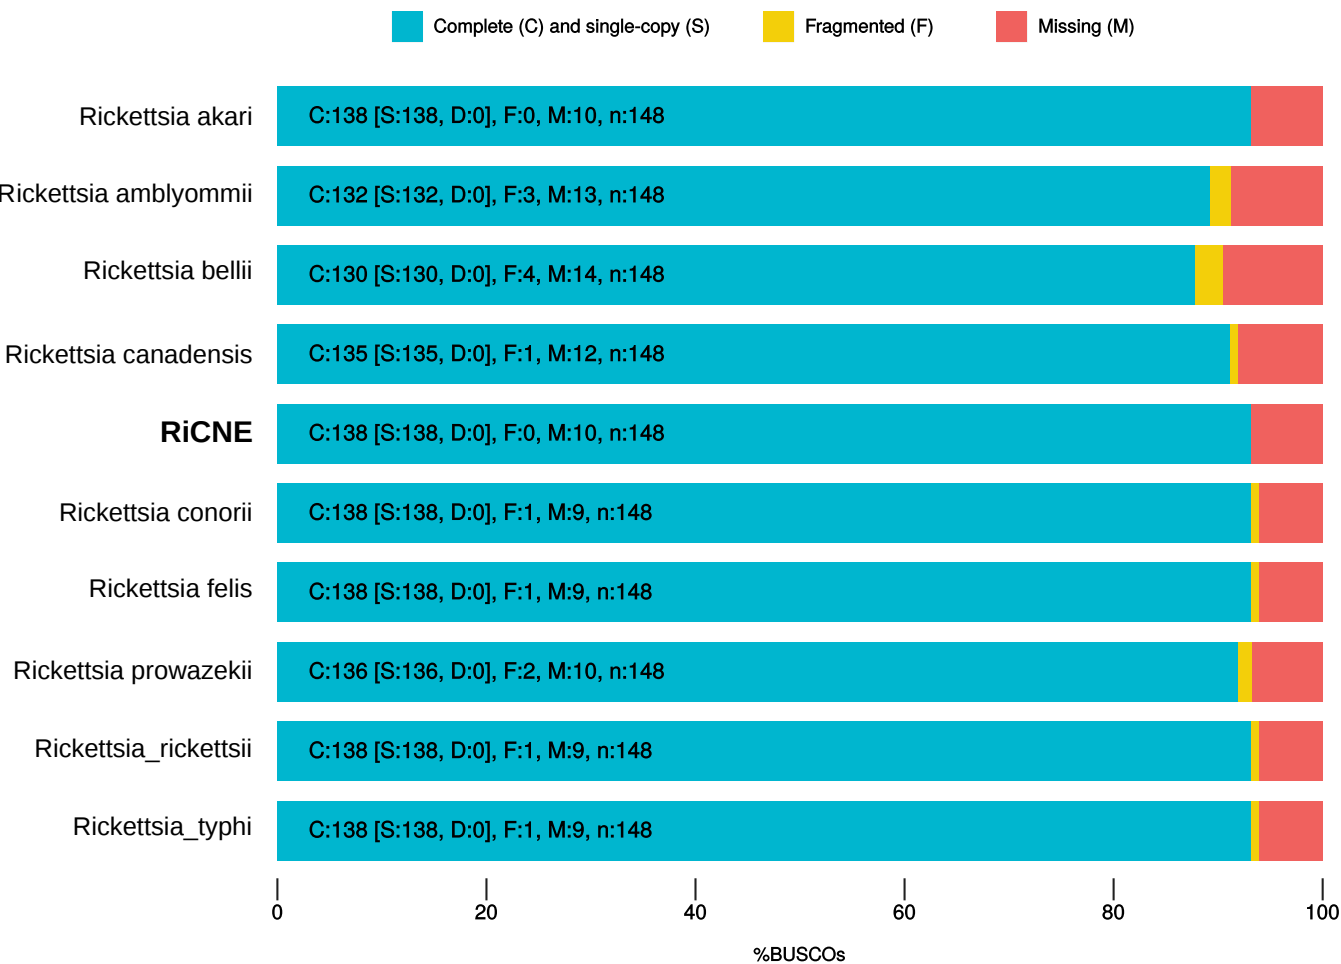

**Figure S2.** BUSCO completeness assessment results for RiCNE draft genome in relation to selected complete *Rickettsia* genomes. The Results are based on the presence or absence of 148 single-copy universal bacterial markers. BUSCO notation: complete (C), single-copy (S), duplicated (D), fragmented (F) and missing (M).
