# Supplementary material for: Torix group Rickettsia are widespread in Culicoides biting midges (Diptera: Ceratopogonidae), reach high frequency and carry unique genomic features
Source: PubMed Central journal article supplement (PMC5656822; doi:10.1111/1462-2920.13887), 2017-09-18
Supplement: EMI-19-4238-s006.pdf [file EMI-19-4238-s006.pdf]

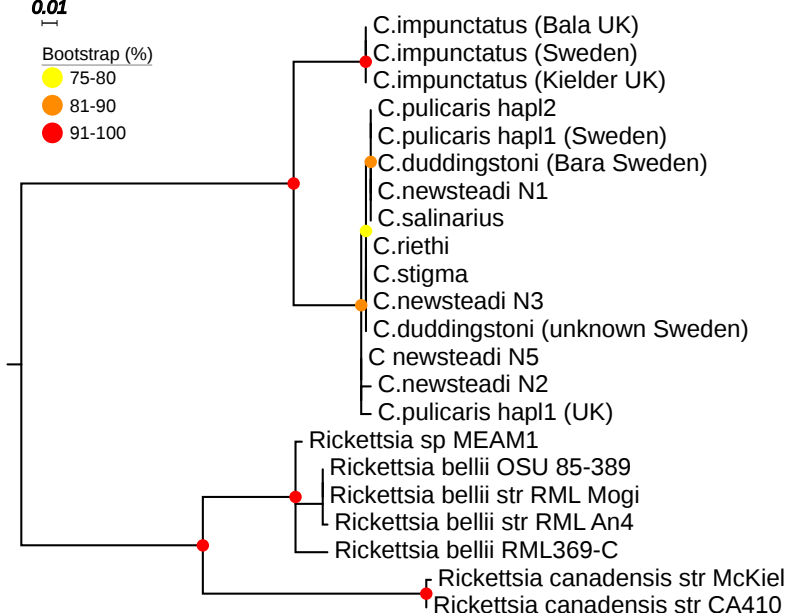

**Figure S6.** Maximum likelihood phylogeny of the *omp* gene. The tree topology was estimated using RaxML and the GTR+G model of nucleotide substitutions. Support values are based on 1000 rapid bootstrap replicates. The tree was midpoint rooted.
